# Supplementary material for: Wide-Range, Rapid, and Specific Identification of Pathogenic Bacteria by Surface-Enhanced Raman Spectroscopy
Source: PubMed Central journal article supplement (PMC8406416; doi:10.1021/acssensors.1c00641), 2021-07-20
Supplement: se1c00641_si_001.pdf [file se1c00641_si_001.pdf]

## Supporting Information

### Wide-Range, Rapid, and Specific Identification of Pathogenic Bacteria by Surface-Enhanced Raman Spectroscopy

Siying Liu,<sup>‡,1,2,3</sup> Qiushi Hu,<sup>‡,4</sup> Chao Li,<sup>‡,5</sup> Fangrong Zhang,<sup>6,7</sup> Hongjing Gu,<sup>8</sup> Xinrui Wang,<sup>9</sup> Shuang Li,<sup>4</sup> Lei Xue,<sup>4</sup> Tobias Madl,<sup>1,2,6,7,\*</sup> Yun Zhang,<sup>1,2,3,\*</sup> Lei Zhou,<sup>4,\*</sup>

<sup>1</sup> CAS Key Laboratory of Design and Assembly of Functional Nanostructures, and Fujian Provincial Key Laboratory of Nanomaterials, Fujian Institute of Research on the Structure of Matter, Chinese Academy of Sciences, Fuzhou 350002, China

<sup>2</sup> Department of Translational Medicine, Xiamen Institute of Rare Earth Materials, Chinese Academy of Sciences, Xiamen 361021, China

<sup>3</sup> University of Chinese Academy of Sciences, Beijing 100049, China

<sup>4</sup> State Key Laboratory of Biochemical Engineering, PLA Key Laboratory of Biopharmaceutical Production & Formulation Engineering, Institute of Process Engineering, Chinese Academy of Sciences, Beijing 100190, China

<sup>5</sup> Institute of Medical Equipment, Academy of Military Sciences, Tianjin 300161, China

<sup>6</sup> Gottfried Schatz Research Center for Cell Signaling, Metabolism and Aging, Institute of Molecular Biology & Biochemistry, Medical University of Graz, Neue Stiftingtalstrasse 6, 8010 Graz, Austria

<sup>7</sup> BioTechMed-Graz, Graz, Austria

<sup>8</sup> State Key Laboratory of Pathogen and Biosecurity, Beijing Institute of Microbiology and Epidemiology, Beijing 100071, China

<sup>9</sup> Anti-plague Institute Hebei Province, Zhangjiakou 075000, China

<sup>‡</sup> Equal contribution

\* Corresponding authors, Email: tobias.madl@medunigraz.at, zhangy@fjirsm.ac.cn, zhouleil7@ipe.ac.cn

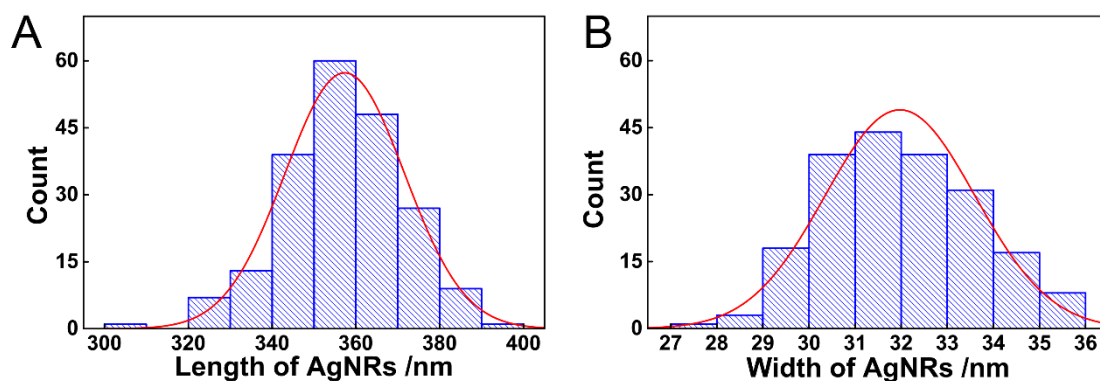

**Figure S1.** Statistical diagrams of the length (A) and width (B) of AgNRs.

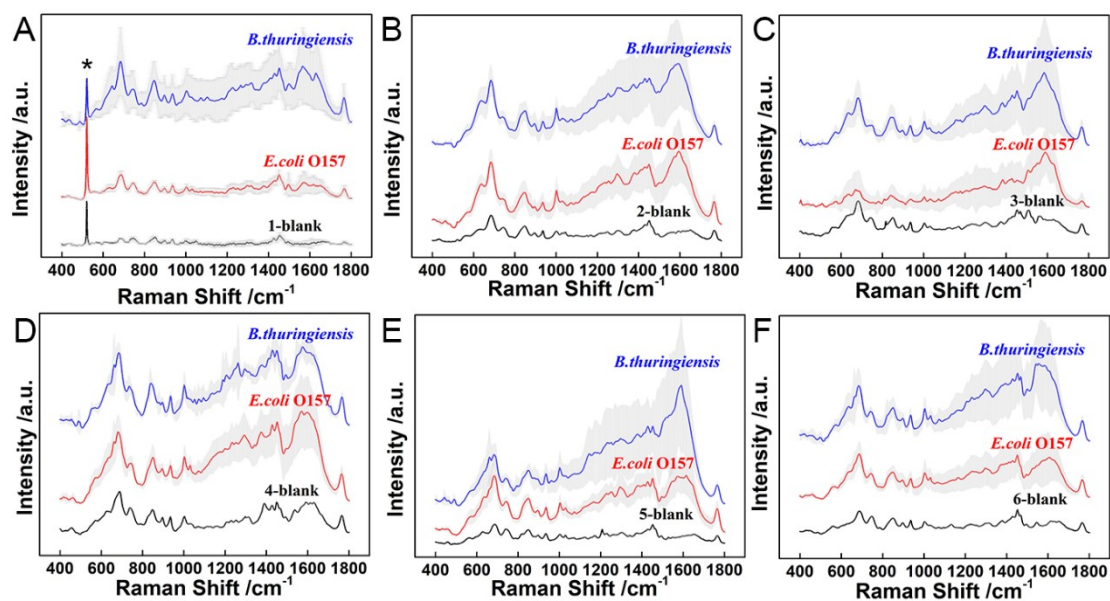

**Figure S2.** Mean average SERS spectra of blank and bacteria with different layers before (A-F) acetic acid treatment. (A) NL = 1, (B) NL = 2, (C) NL = 3, (D) NL = 4, (E) NL = 5, (F), NL = 6. Gray color shows the error bar of each spectra. The peak marked with \* indicates Si peak.

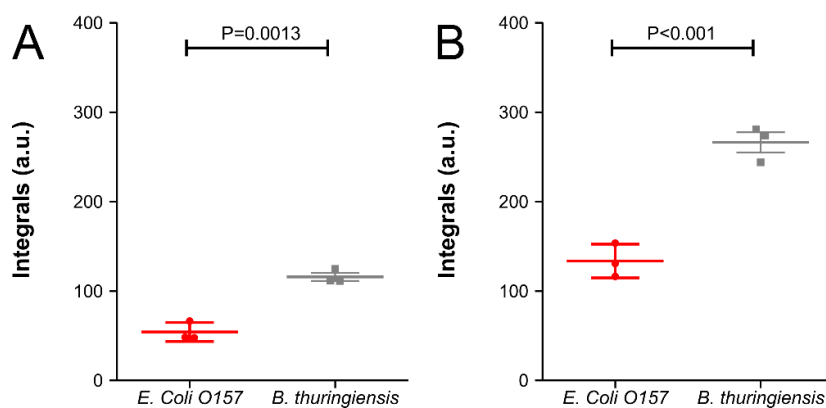

**Figure S3.** The integral of Raman shift: 1769 for (before acetic acid) and 526 for (after acetic acid) in the *E. Coli* O157 (red) and *B. thuringiensis* (grey), respectively.

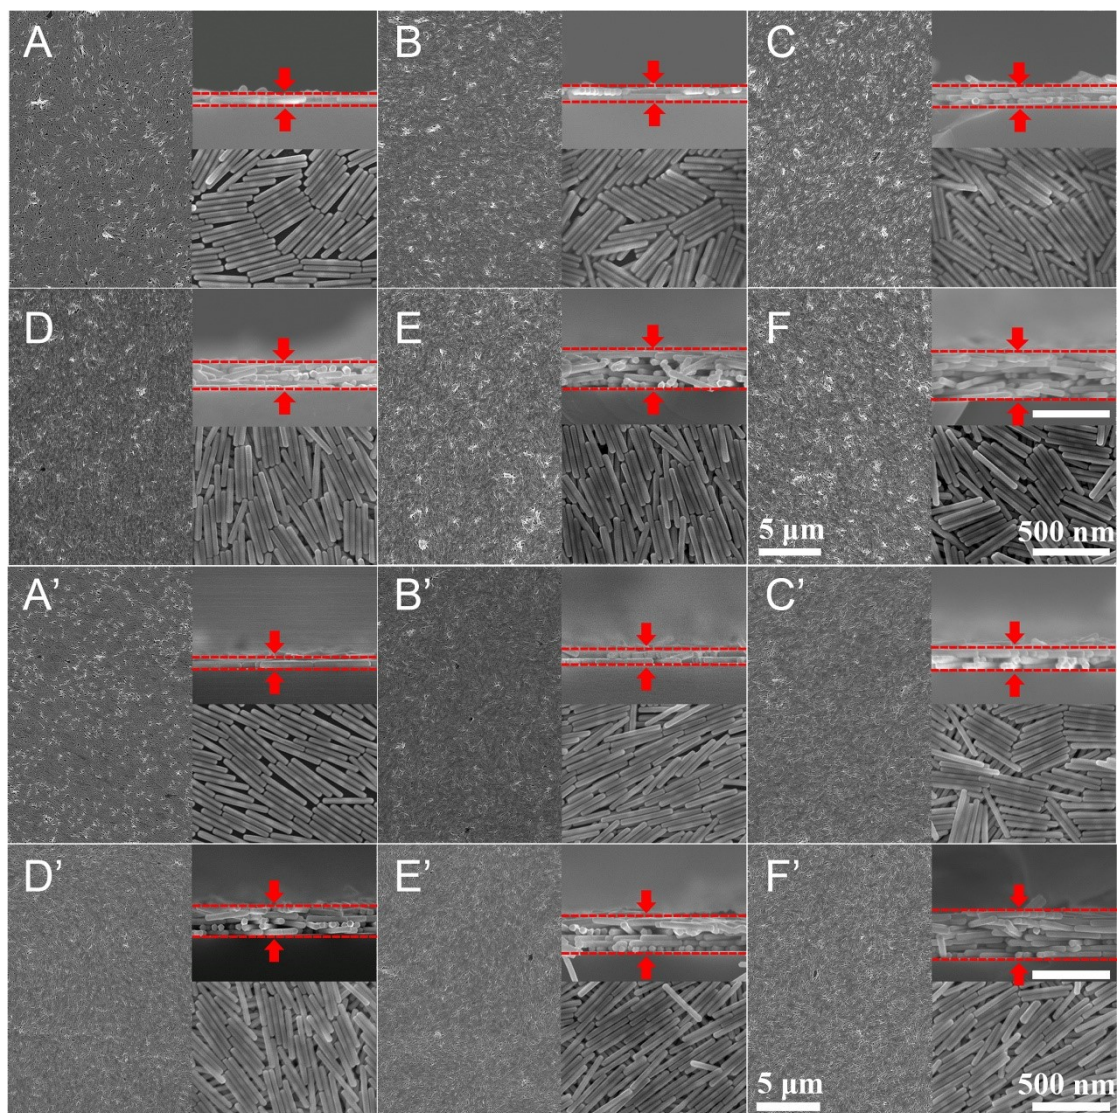

**Figure S4.** SEM of SERS substrates with different number of layers (NL) of untreated (A-F) and acetic acid treated (A'-F') substrate and the diagram of the relationship between the NL and thickness of the substrates. (A), (A') NL = 1, (B), (B') NL = 2, (C), (C') NL = 3, (D), (D') NL = 4, (E), (E') NL = 5, (F), (F') NL = 6.

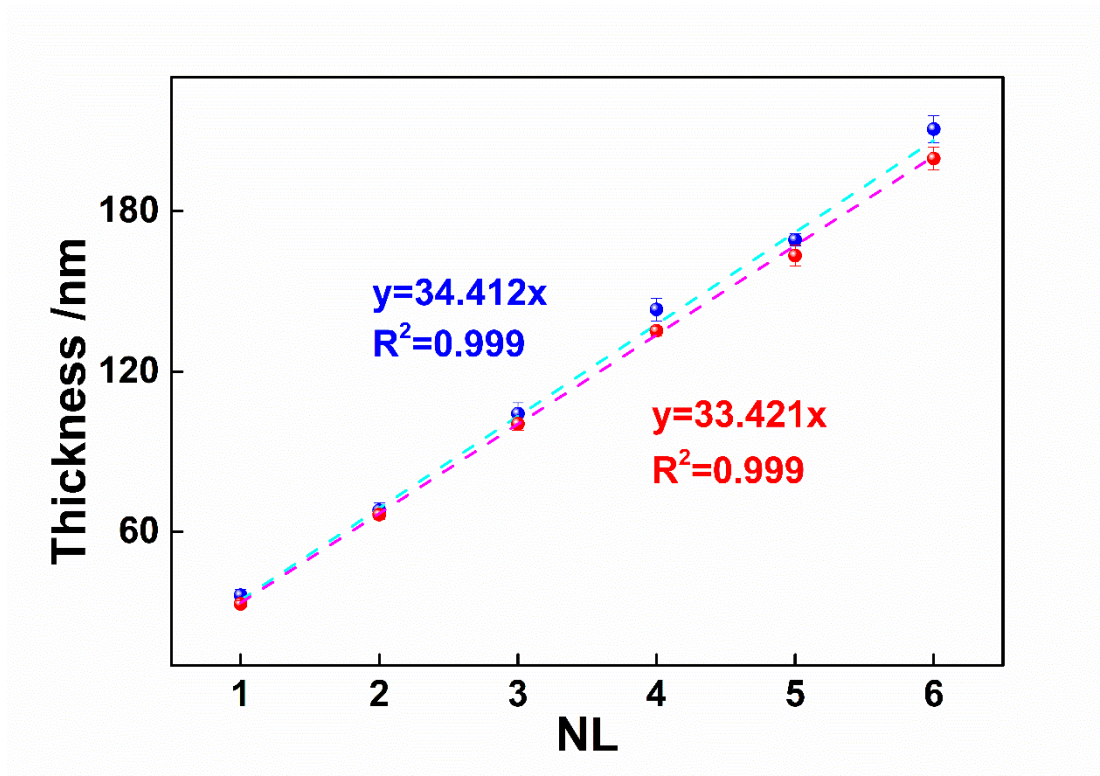

**Figure S5.** Relationship of NL and thickness of the substrates (the untreated marked in blue, the acetic treated marked in red). It can be seen that after the treatment of acetic acid, the thickness of SERS substrate is slightly thinner than the original one, indicating the partial removal of PVP on AgNRs.

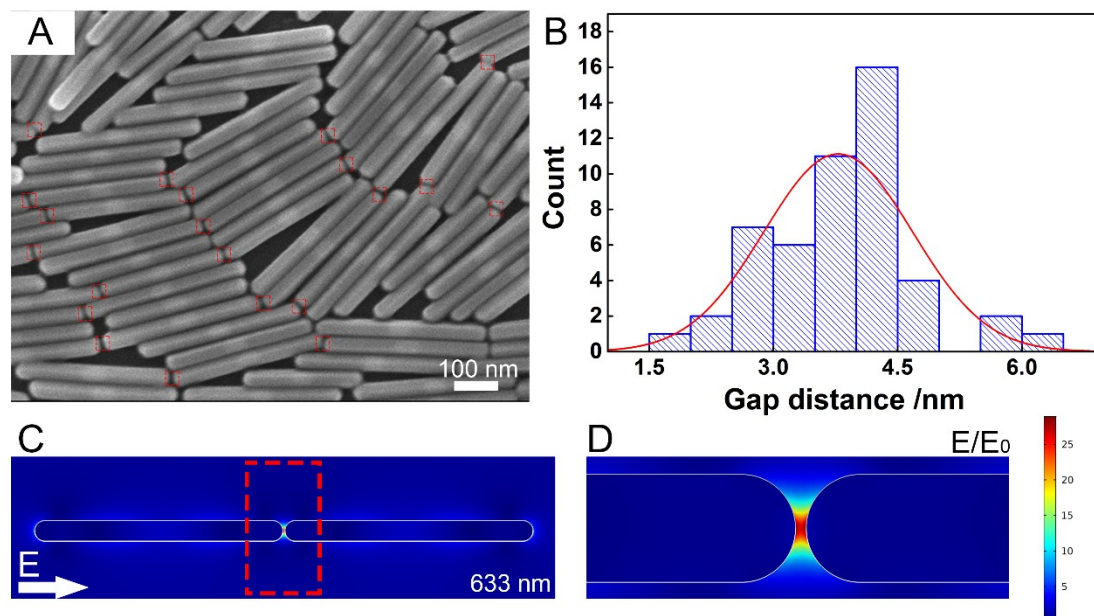

**Figure S6.** (A) SEM image of AgNRs. The distance calculated between the two ends of AgNRs are marked in red, dashed box. (B) Statistical diagram of the gap distance between two ends of AgNRs calculated from (A). (C) Theoretical simulation of the electromagnetic field enhancement between two AgNRs. The length of AgNRs was 360 nm, and the gap between two

AgNRs was 3 nm. The excitation laser wavelength was 633 nm. The intensity of the electromagnetic field is represented by color scale. (D) Zoom of the hot spot between two AgNRs of (C).

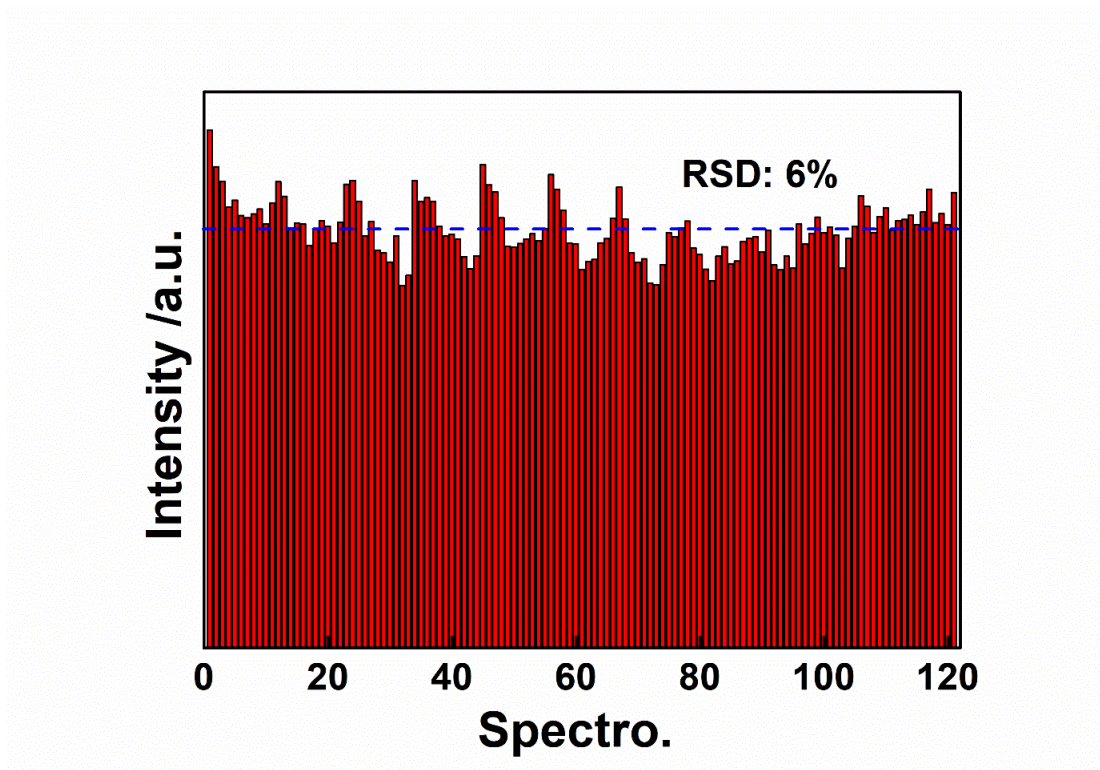

**Figure S7.** SERS intensity of the monolayer AgNRs substrate, showing a relative standard deviation of 6%.

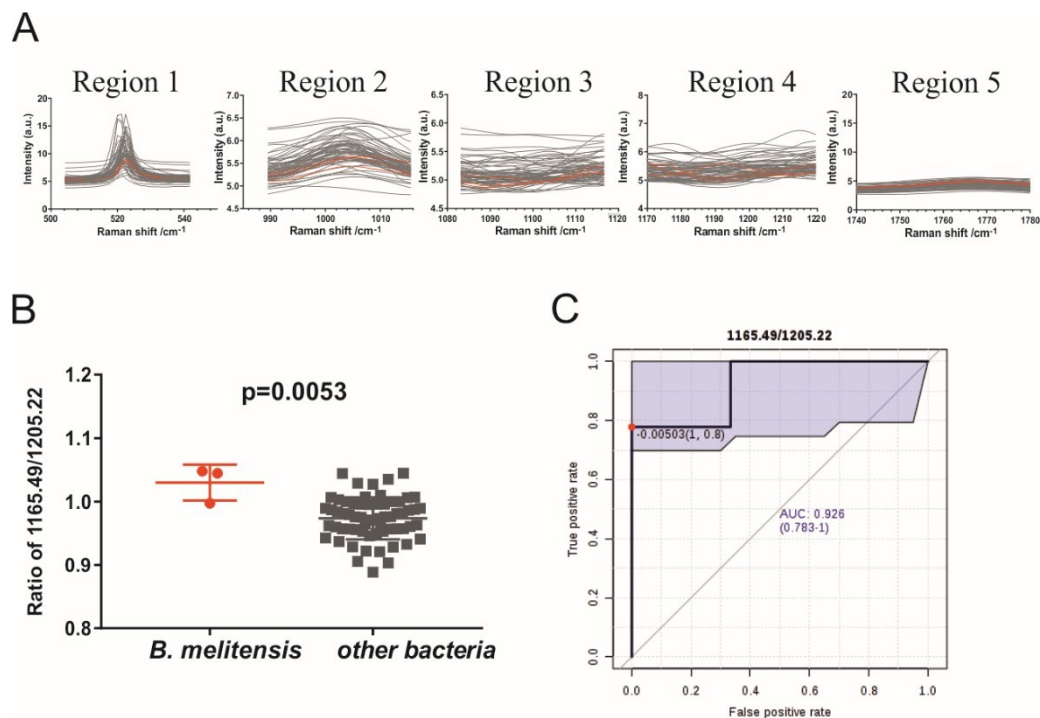

**Figure S8.** (A) SERS spectra of different region (selected) between the *B. melitensis* (red) and other 21 bacteria (grey). (B) Ratio of integral of Raman shift: 1165.49/1205.22 in the *B. melitensis* (red) and other 21 bacteria (grey). (C) ROC curve with a 95% confidence interval (in brackets) generated from defined feature (ratio of integral of Raman shift: 1165.49/ 1205.22).

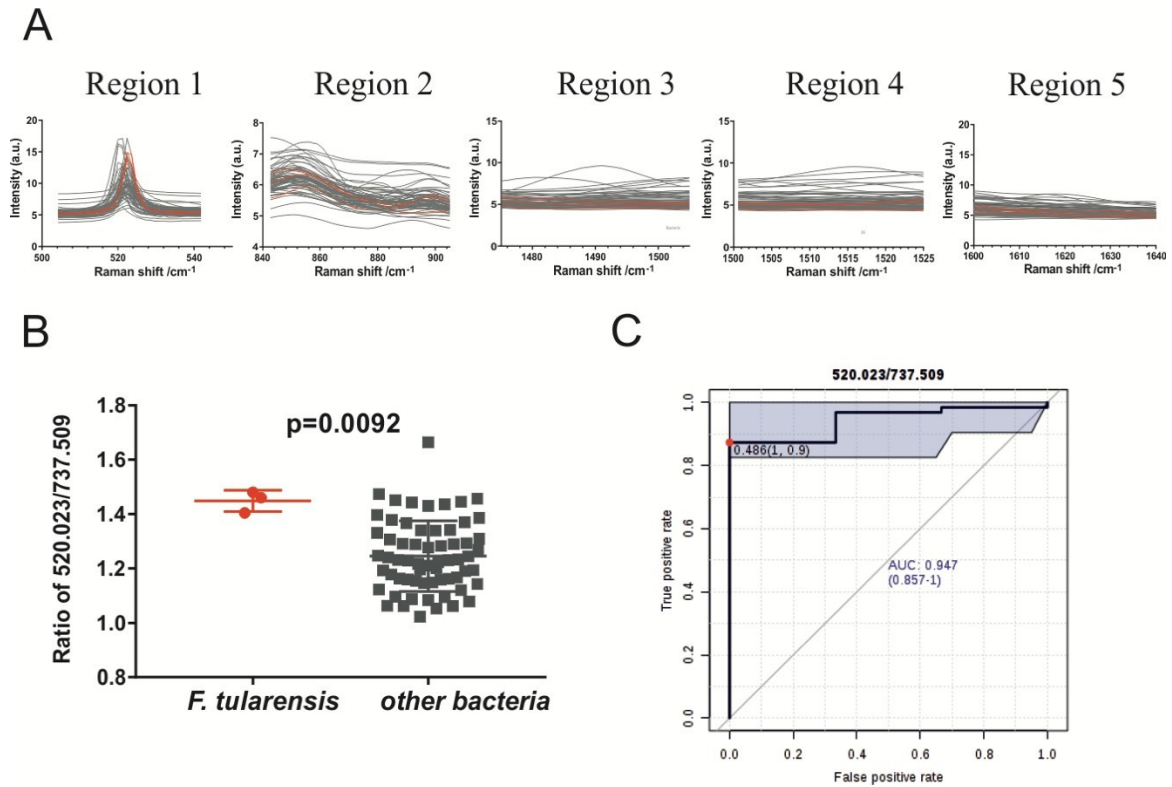

**Figure S9.** (A) SERS spectra of different region (selected) between the *F. tularensis* (red) and other 21 bacteria (grey). (B) Ratio of integral of Raman shift: 520.023/ 737.509 in the *F. tularensis* (red) and other 21 bacteria (grey). (C) ROC curve with a 95% confidence interval (in brackets) generated from defined feature (ratio of integral of Raman shift: 520.023/ 737.509).

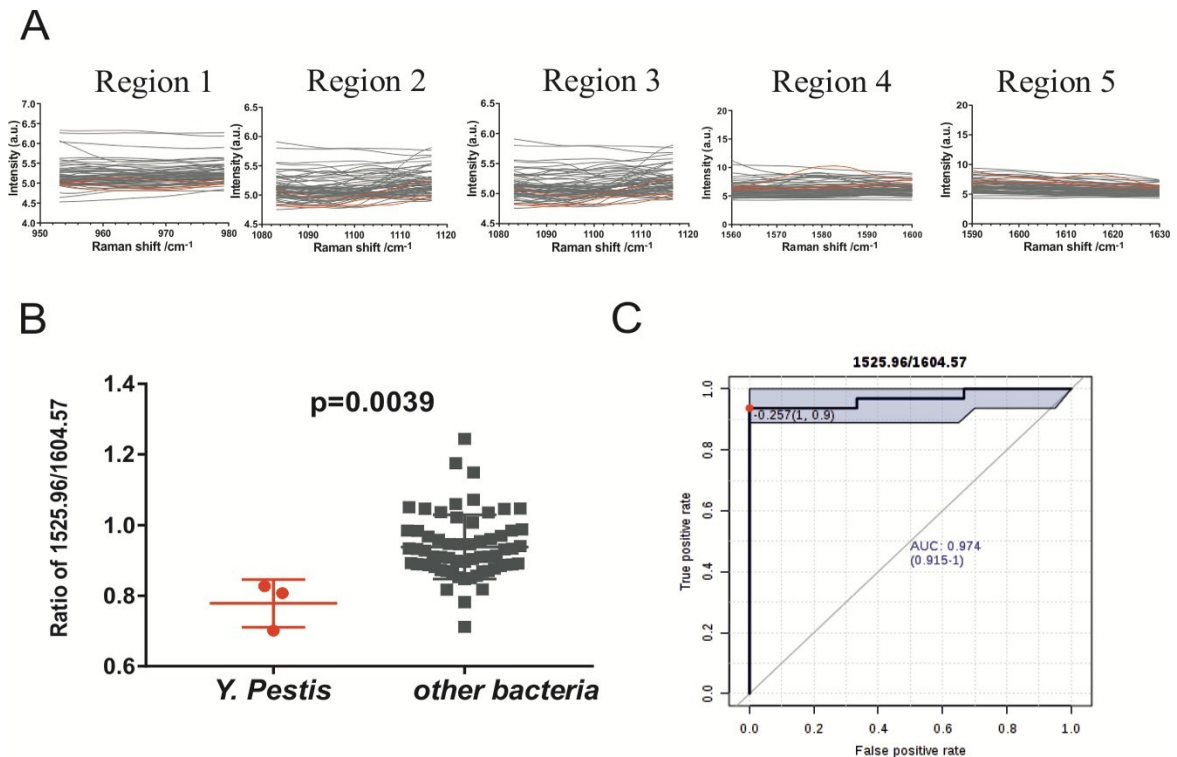

**Figure S10.** (A) SERS spectra of different region (selected) between the *Y. pestis* (red) and other 21 bacteria (grey). (B) Ratio of integral of Raman shift: 1525.96/ 1604.57 in the *Y. pestis* (red) and other 21 bacteria (grey). (C) ROC curve with a 95% confidence interval (in brackets) generated from defined feature (ratio of integral of Raman shift: 1525.96/ 1604.57).

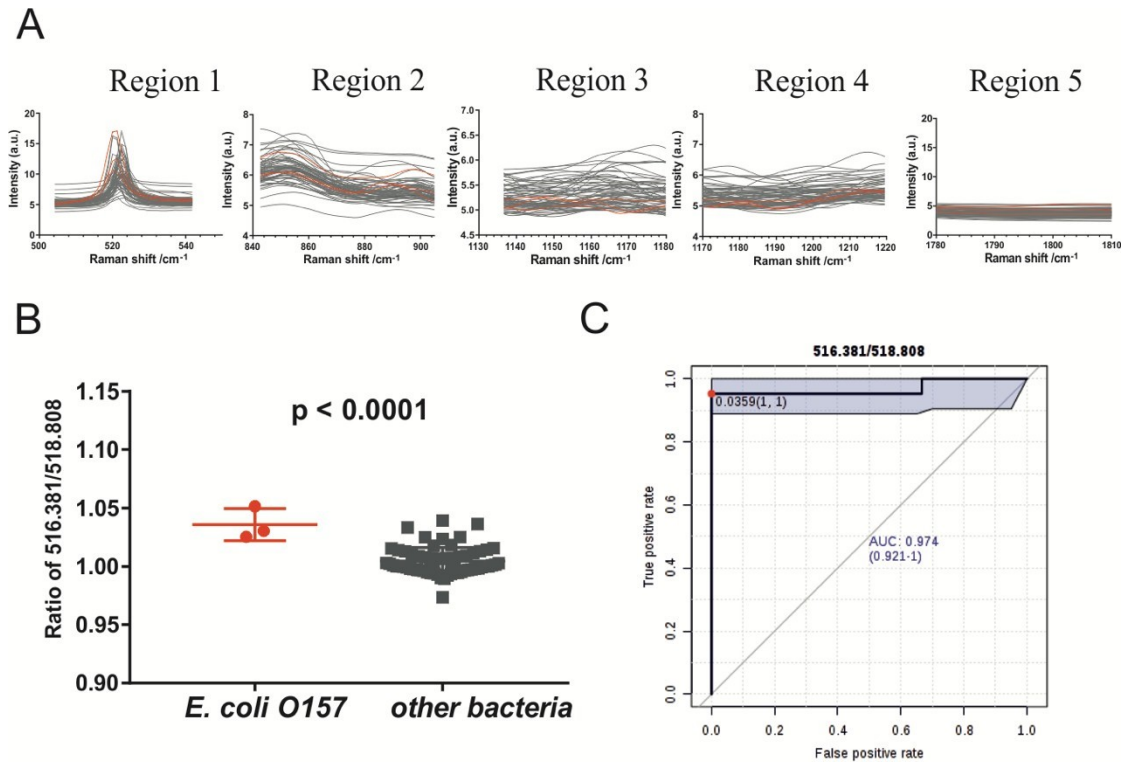

**Figure S11.** (A) SERS spectra of different region (selected) between the *E. coli* O157 (red) and other 21 bacteria (grey). (B) Ratio of integral of Raman shift: 516.381/ 518.808 in the *E. coli* O157 (red) and other 21 bacteria (grey). (C) ROC curve with a 95% confidence interval (in brackets) generated from defined feature (ratio of integral of Raman shift: 516.381/ 518.808).

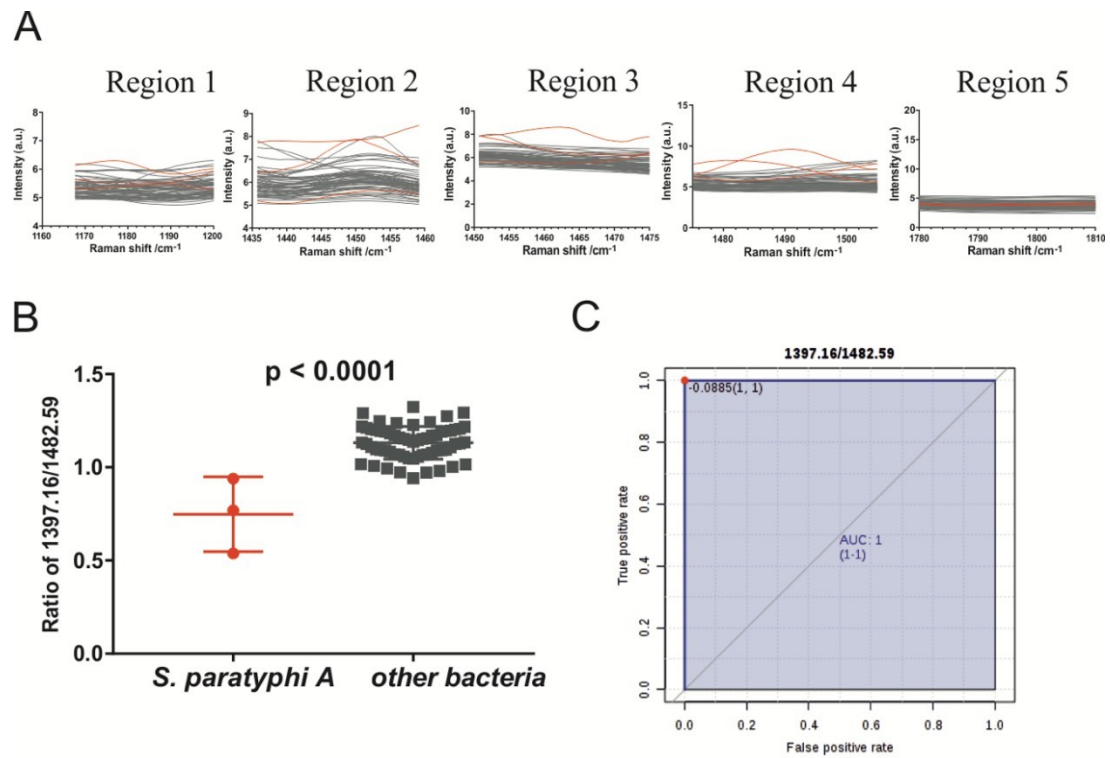

**Figure S12.** (A) SERS spectra of different region (selected) between the *S. paratyphi* A (red) and other 21 bacteria (grey). (B) Ratio of integral of Raman shift: 1397.16/ 1482.59 in the *S. paratyphi* A (red) and other 21 bacteria (grey). (C) ROC

curve with a 95% confidence interval (in brackets) generated from defined feature (ratio of integral of Raman shift: 1397.16/1482.59).

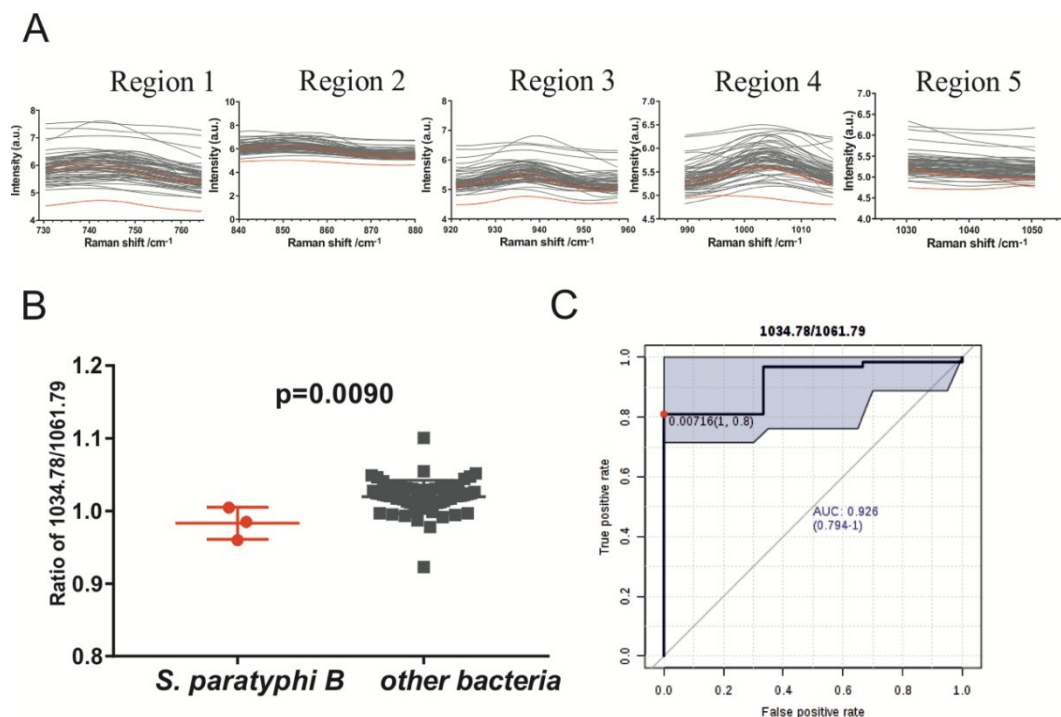

**Figure S13.** (A) SERS spectra of different region (selected) between the *S. paratyphi B* (red) and other 21 bacteria (grey). (B) Ratio of integral of Raman shift: 1034.78/ 1061.79 in the *S. paratyphi B* (red) and other 21 bacteria (grey). (C) ROC curve with a 95% confidence interval (in brackets) generated from defined feature (ratio of integral of Raman shift: 1034.78/ 1061.79).

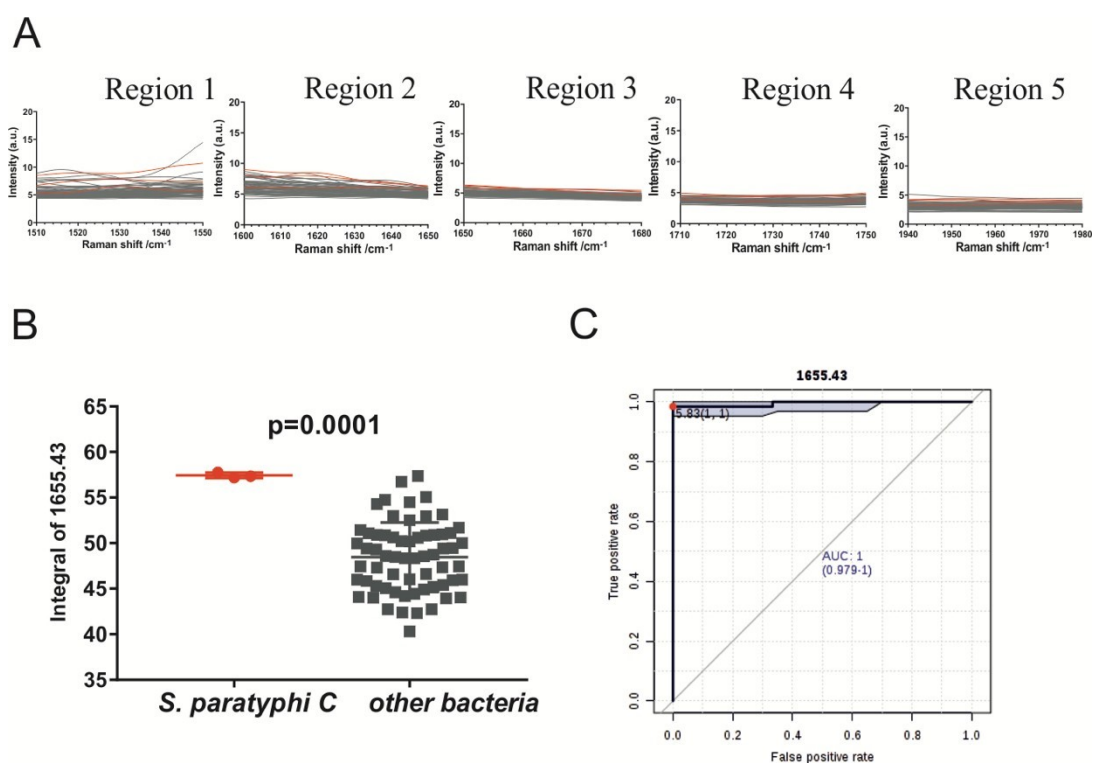



**Figure S14.** (A) SERS spectra of different region (selected) between the *S. paratyphi* C (red) and other 21 bacteria (grey). (B) Integral of Raman shift: 1655.43 in the *S. paratyphi* C (red) and other 21 bacteria (grey). (C) ROC curve with a 95% confidence interval (in brackets) generated from defined feature (integral of Raman shift: 1655.43).

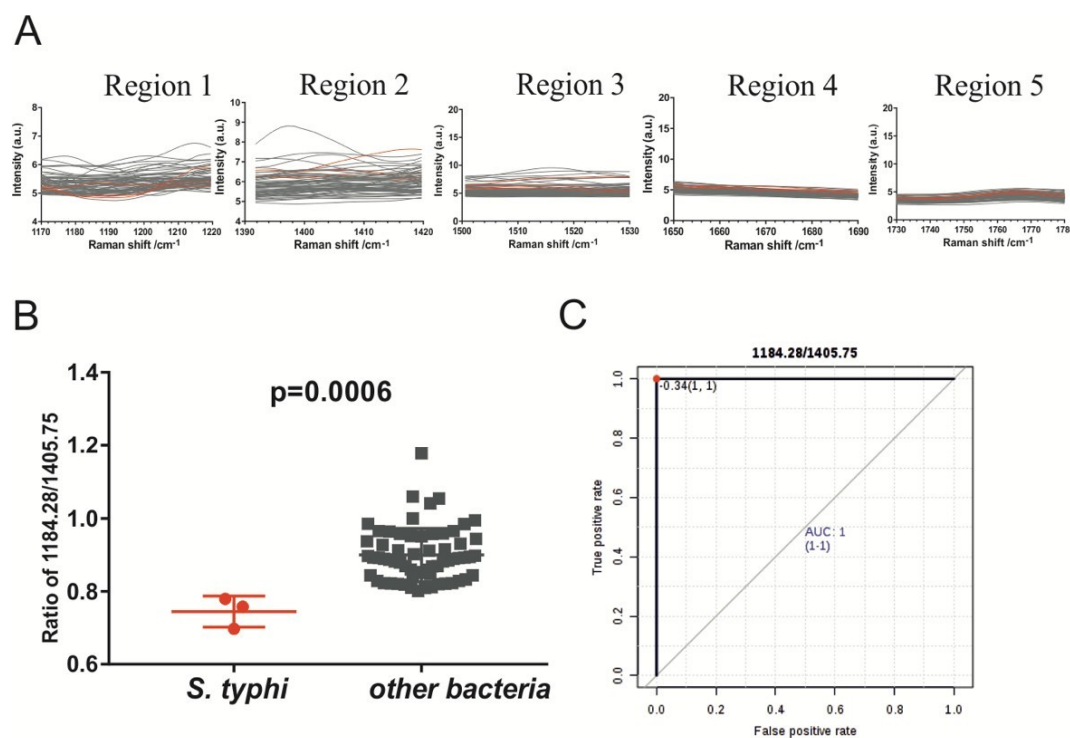

**Figure S15.** (A) SERS spectra of different region (selected) between the *S. typhi* (red) and other 21 bacteria (grey). (B) Ratio of integral of Raman shift: 1184.28/ 1405.75 in the *S. typhi* (red) and other 21 bacteria (grey). (C) ROC curve with a 95% confidence interval (in brackets) generated from defined feature (ratio of integral of Raman shift: 1184.28/ 1405.75).

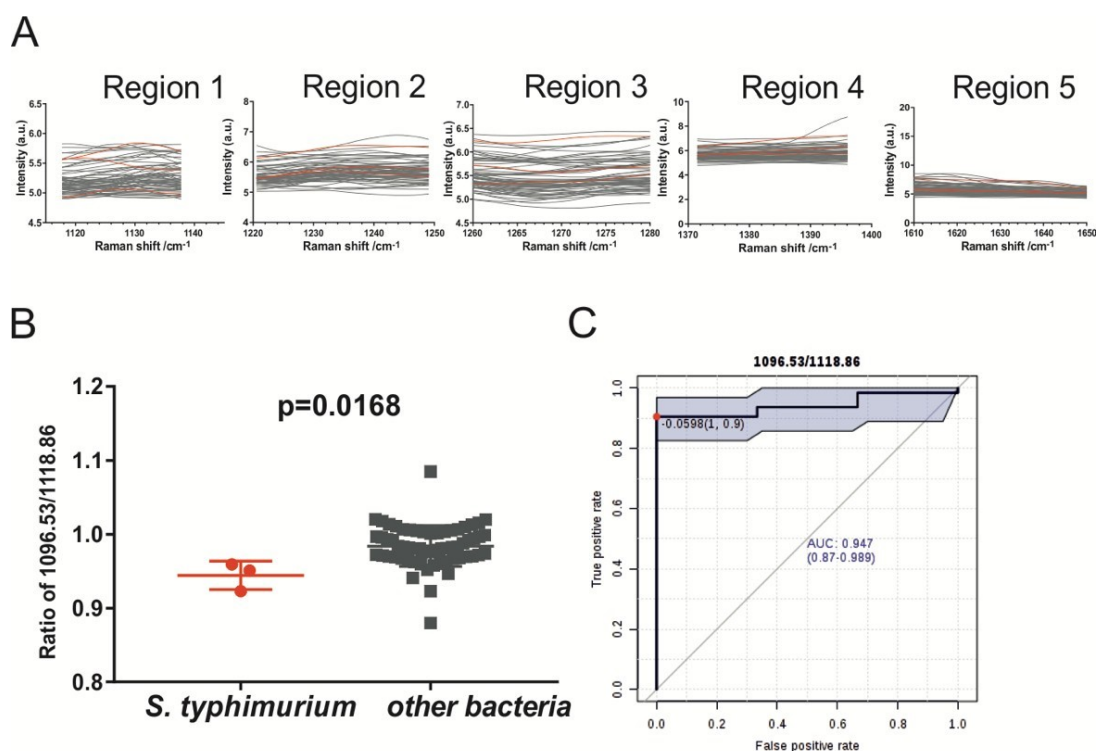

**Figure S16.** (A) SERS spectra of different region (selected) between the *S. typhimurium* (red) and other 21 bacteria (grey). (B) Ratio of integral of Raman shift: 1096.53/ 1118.86 in the *S. typhimurium* (red) and other 21 bacteria (grey). (C) ROC curve with a 95% confidence interval (in brackets) generated from defined feature (ratio of integral of Raman shift: 1096.53/ 1118.86).

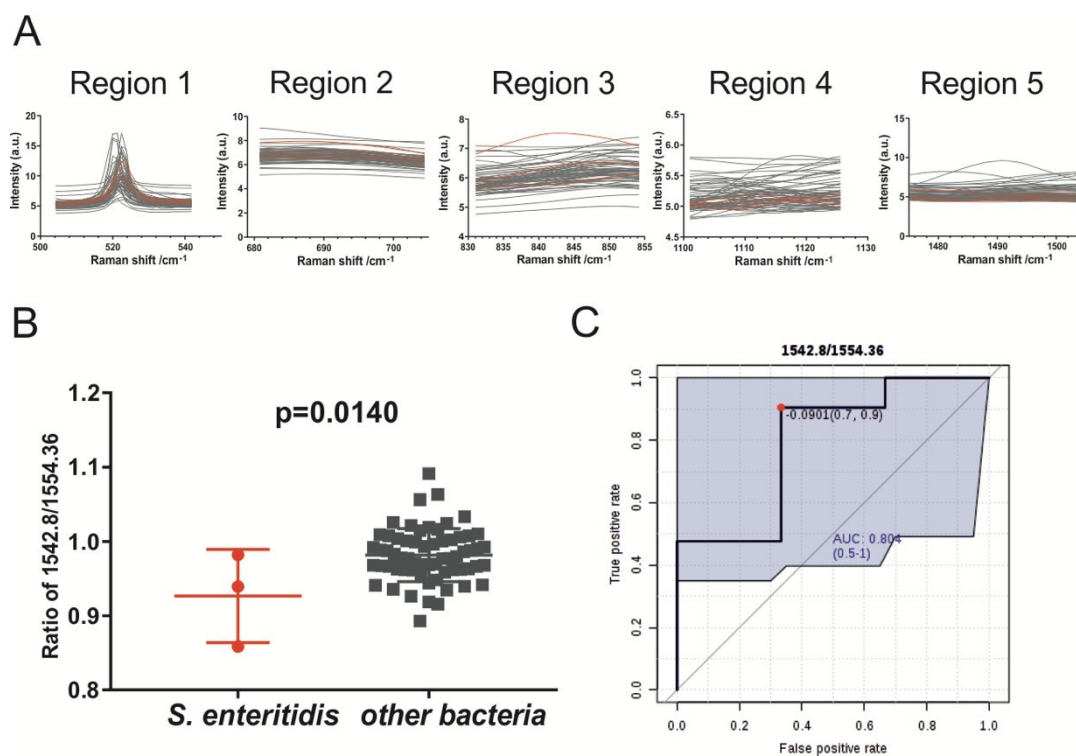

**Figure S17.** (A) SERS spectra of different region (selected) between the *S. enteritidis* (red) and other 21 bacteria (grey). (B) Ratio of integral of Raman shift: 1542.8/ 1554.36 in the *S. enteritidis* (red) and other 21 bacteria (grey). (C) ROC curve with a 95% confidence interval (in brackets) generated from defined feature (ratio of integral of Raman shift: 1542.8/ 1554.36).

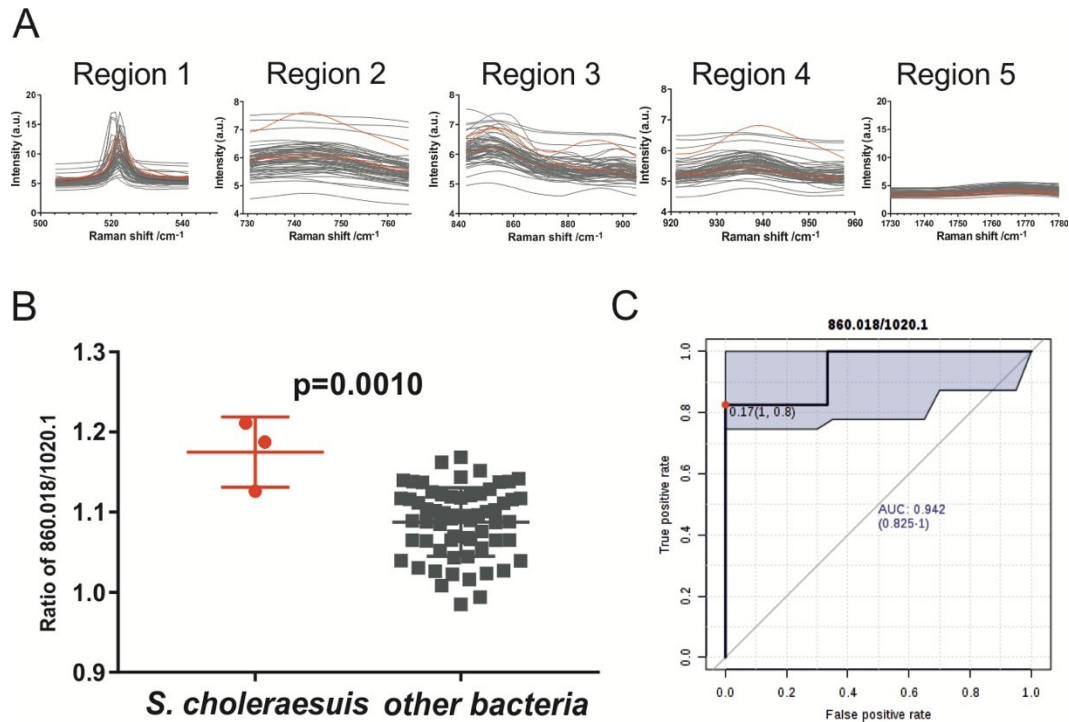

**Figure S18.** (A) SERS spectra of different region (selected) between the *S. choleraesuis* (red) and other 21 bacteria (grey). (B) Ratio of integral of Raman shift: 860.018/ 1020.1 in the *S. choleraesuis* (red) and other 21 bacteria (grey). (C) ROC curve with a 95% confidence interval (in brackets) generated from defined feature (ratio of integral of Raman shift: 860.018/ 1020.1).

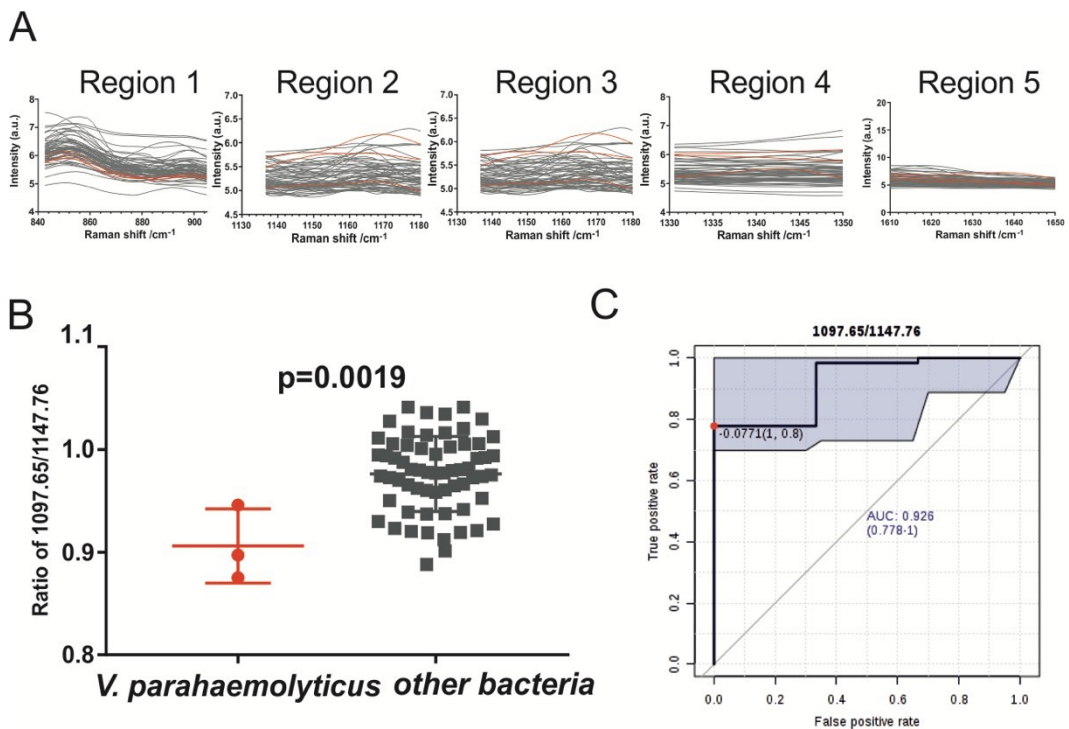

**Figure S19.** (A) SERS spectra of different region (selected) between the *V. parahaemolyticus* (red) and other 21 bacteria (grey). (B) Ratio of integral of Raman shift: 1097.65/ 1147.76 in the *V. parahaemolyticus* (red) and other 21 bacteria (grey). (C) ROC curve with a 95% confidence interval (in brackets) generated from defined feature (ratio of integral of Raman shift: 1097.65/ 1147.76).

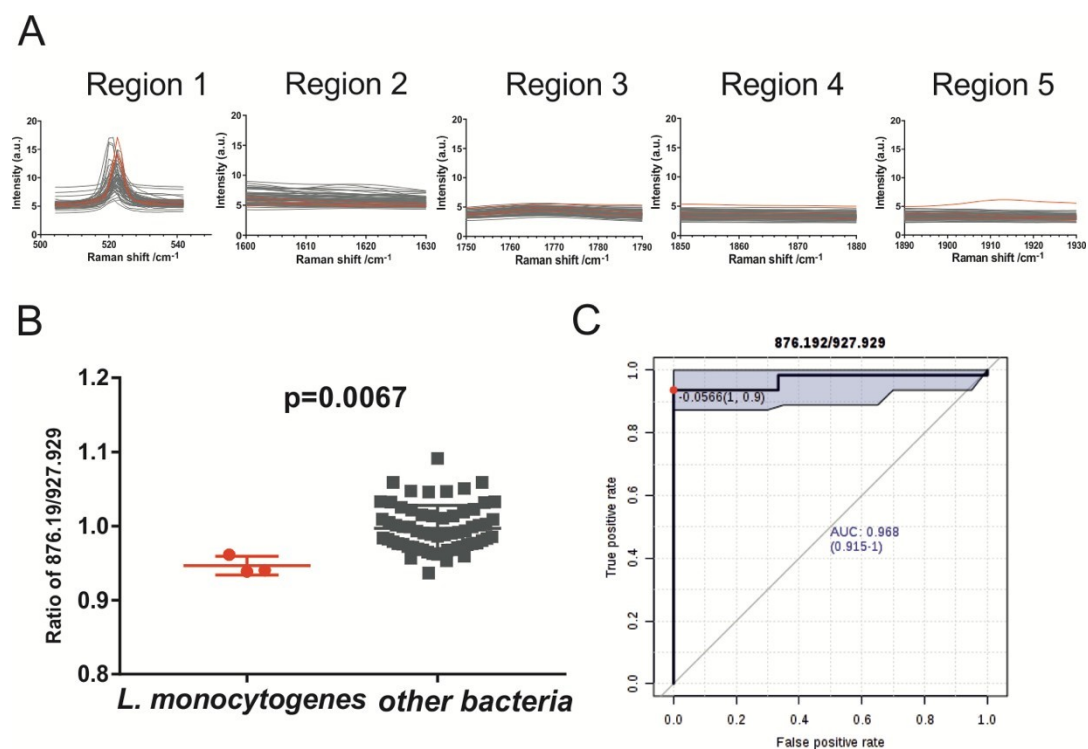

**Figure S20.** (A) SERS spectra of different region (selected) between the *L. monocytogenes* (red) and other 21 bacteria (grey). (B) Ratio of integral of Raman shift: 876.19/ 927.929 in the *L. monocytogenes* (red) and other 21 bacteria (grey). (C) ROC curve with a 95% confidence interval (in brackets) generated from defined feature (ratio of integral of Raman shift: 876.19/ 927.929).

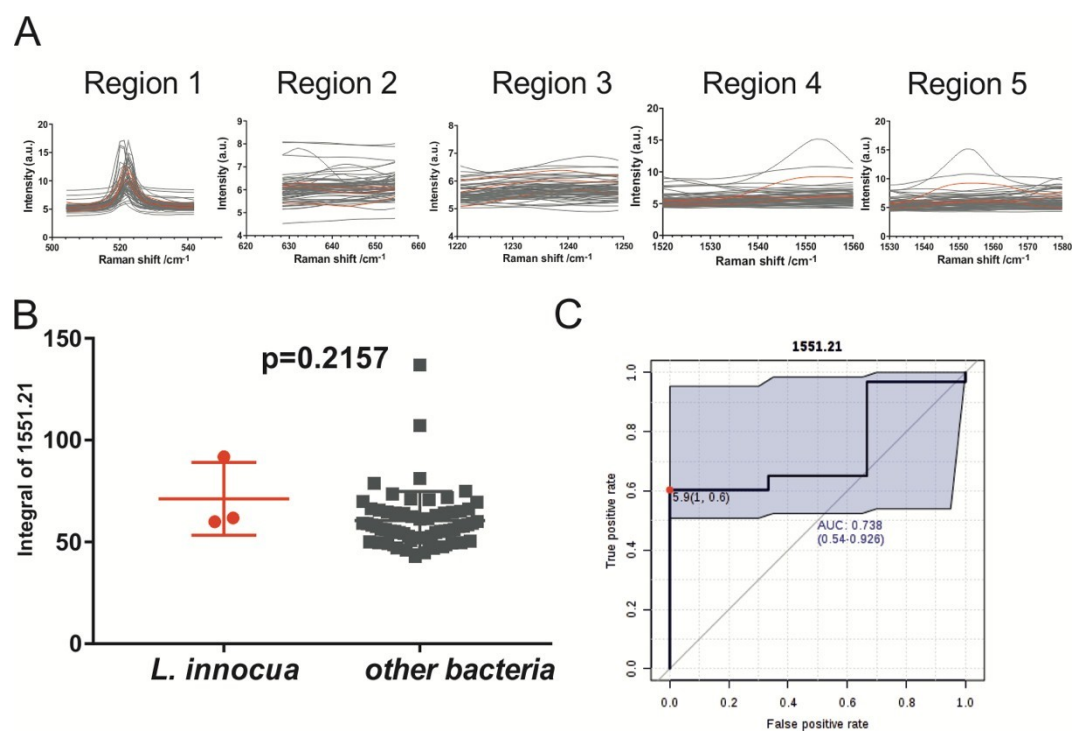

**Figure S21.** (A) SERS spectra of different region (selected) between the *L. innocua* (red) and other 21 bacteria (grey). (B) Integral of Raman shift: 1551.21 in the *L. innocua* (red) and other 21 bacteria (grey). (C) ROC curve with a 95% confidence interval (in brackets) generated from defined feature (integral of Raman shift: 1551.21).

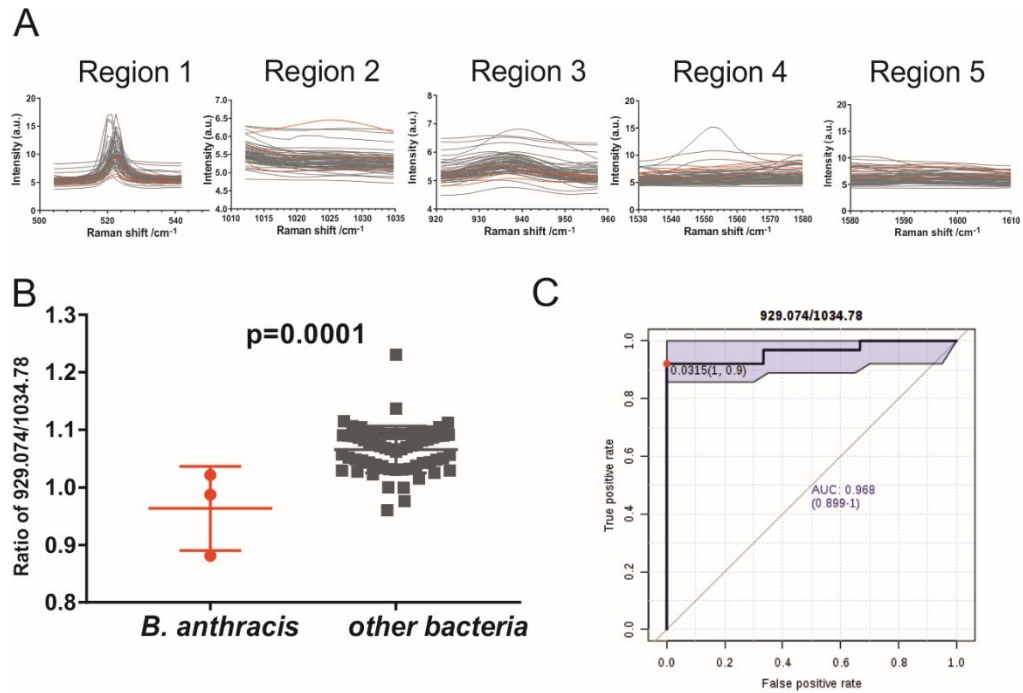

**Figure S22.** (A) SERS spectra of different region (selected) between the *B. anthracis* (red) and other 21 bacteria (grey). (B) Ratio of integral of Raman shift: 929.074/ 1034.78 in the *B. anthracis* (red) and other 21 bacteria (grey). (C) ROC curve with a 95% confidence interval (in brackets) generated from defined feature (ratio of integral of Raman shift: 929.074/ 1034.78).

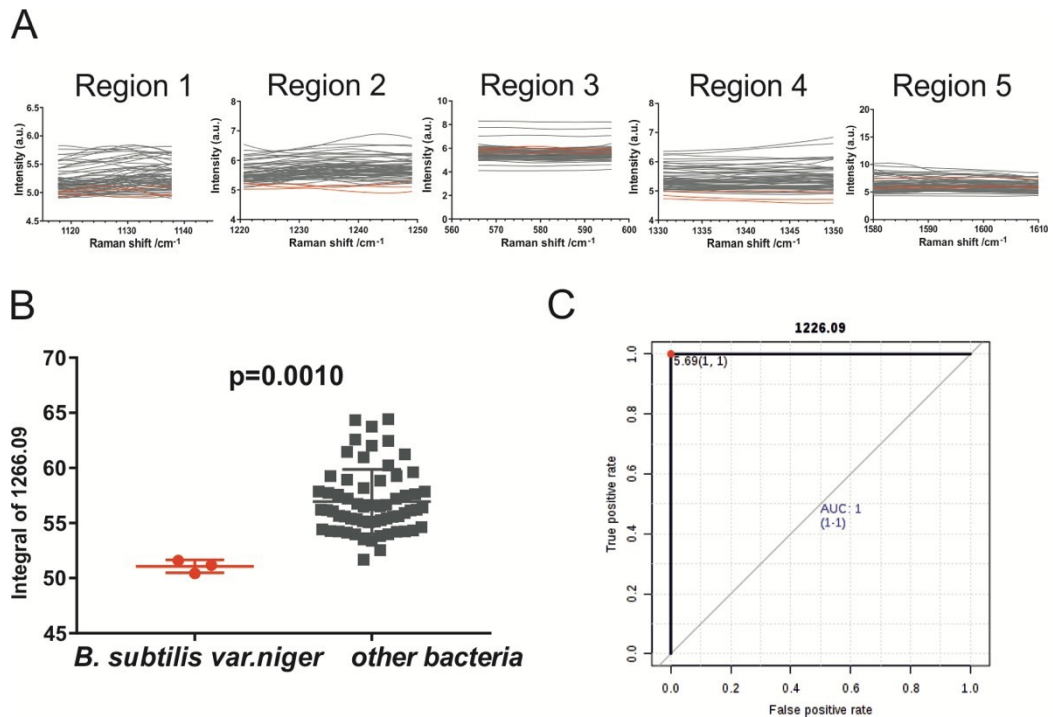

**Figure S23.** (A) SERS spectra of different region (selected) between the *B. subtilis var. niger* (red) and other 21 bacteria (grey). (B) Integral of Raman shift: 1266.09 in the *B. subtilis var. niger* (red) and other 21 bacteria (grey). (C) ROC curve with a 95% confidence interval (in brackets) generated from defined feature (integral of Raman shift: 1266.09).

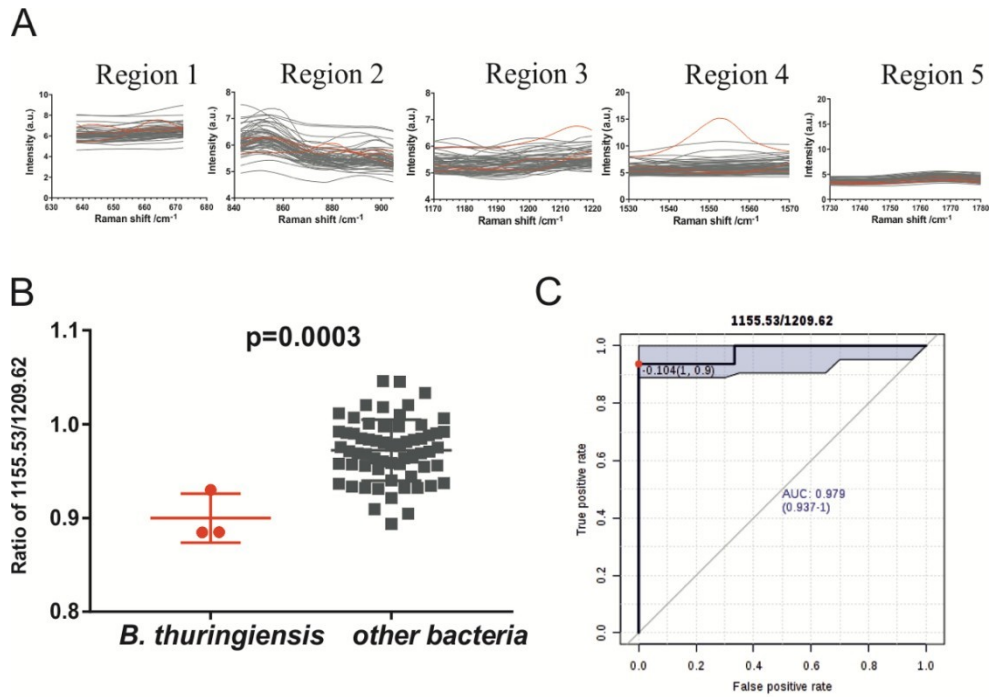

**Figure S24.** (A) SERS spectra of different region (selected) between the *B. thuringiensis* (red) and other 21 bacteria (grey). (B) Ratio of integral of Raman shift: 1155.53/ 1209.62 in the *B. thuringiensis* (red) and other 21 bacteria (grey). (C) ROC curve with a 95% confidence interval (in brackets) generated from defined feature (ratio of integral of Raman shift: 1155.53/ 1209.62).

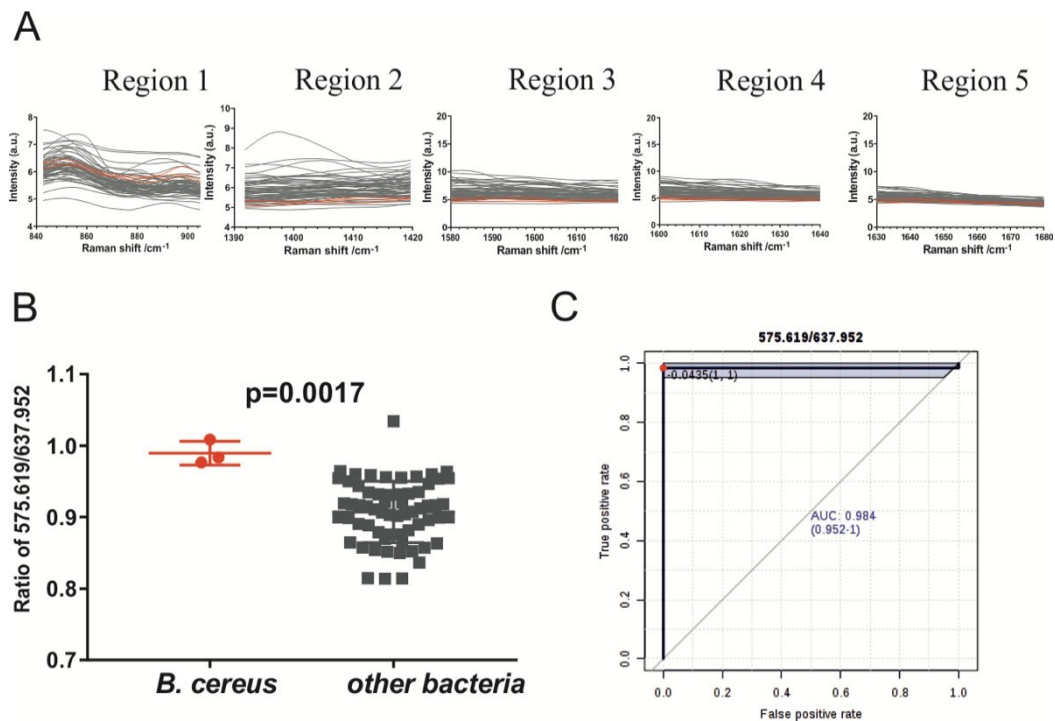

**Figure S25.** (A) SERS spectra of different region (selected) between the *B. cereus* (red) and other 21 bacteria (grey). (B) Ratio of integral of Raman shift: 575.619/ 637.952 in the *B. cereus* (red) and other 21 bacteria (grey). (C) ROC curve with a 95% confidence interval (in brackets) generated from defined feature (ratio of integral of Raman shift: 575.619/ 637.952).

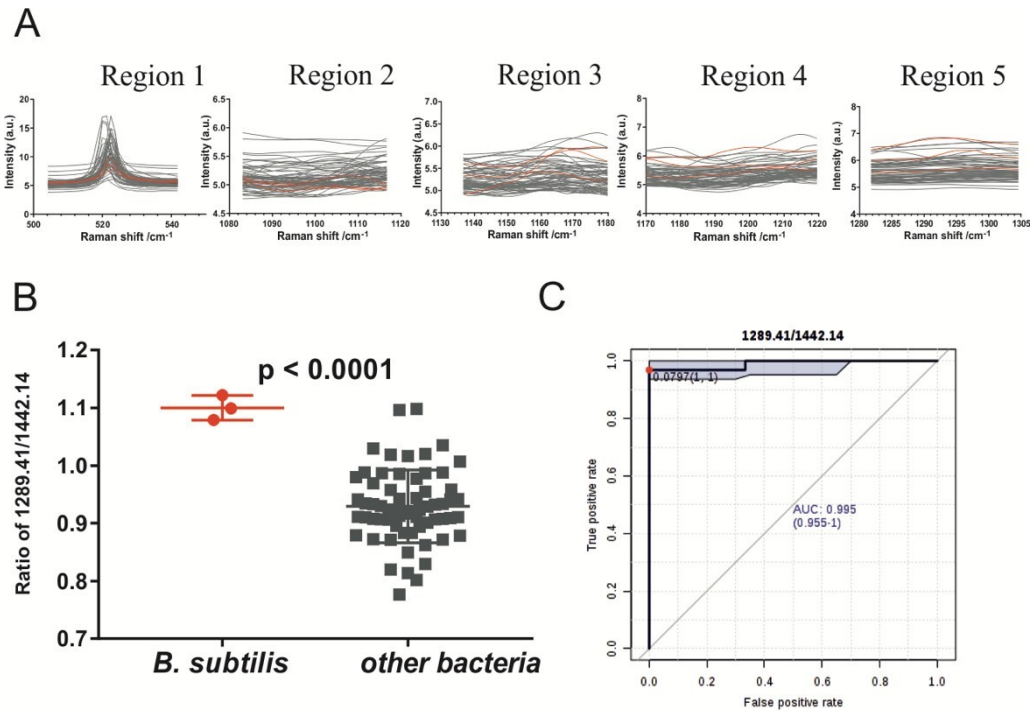

**Figure S26.** (A) SERS spectra of different region (selected) between the *B. subtilis* (red) and other 21 bacteria (grey). (B) Ratio of integral of Raman shift: 1289.41/ 1442.14 in the *B. subtilis* (red) and other 21 bacteria (grey). (C) ROC curve with a 95% confidence interval (in brackets) generated from defined feature (ratio of integral of Raman shift: 1289.41/ 1442.14).

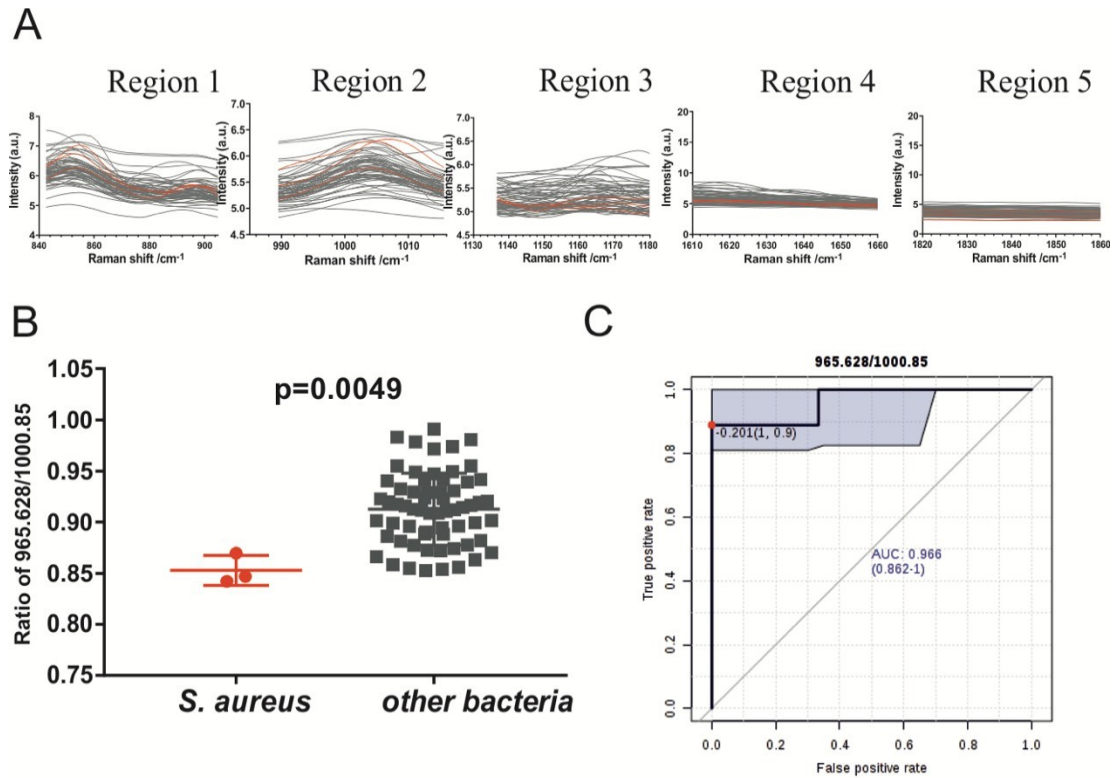

**Figure S27.** (A) SERS spectra of different region (selected) between the *S. aureus* (red) and other 21 bacteria (grey). (B) Ratio of integral of Raman shift: 965.628/ 1000.85 in the *S. aureus* (red) and other 21 bacteria (grey). (C) ROC curve with a 95% confidence interval (in brackets) generated from defined feature (ratio of integral of Raman shift: 965.628/ 1000.85).

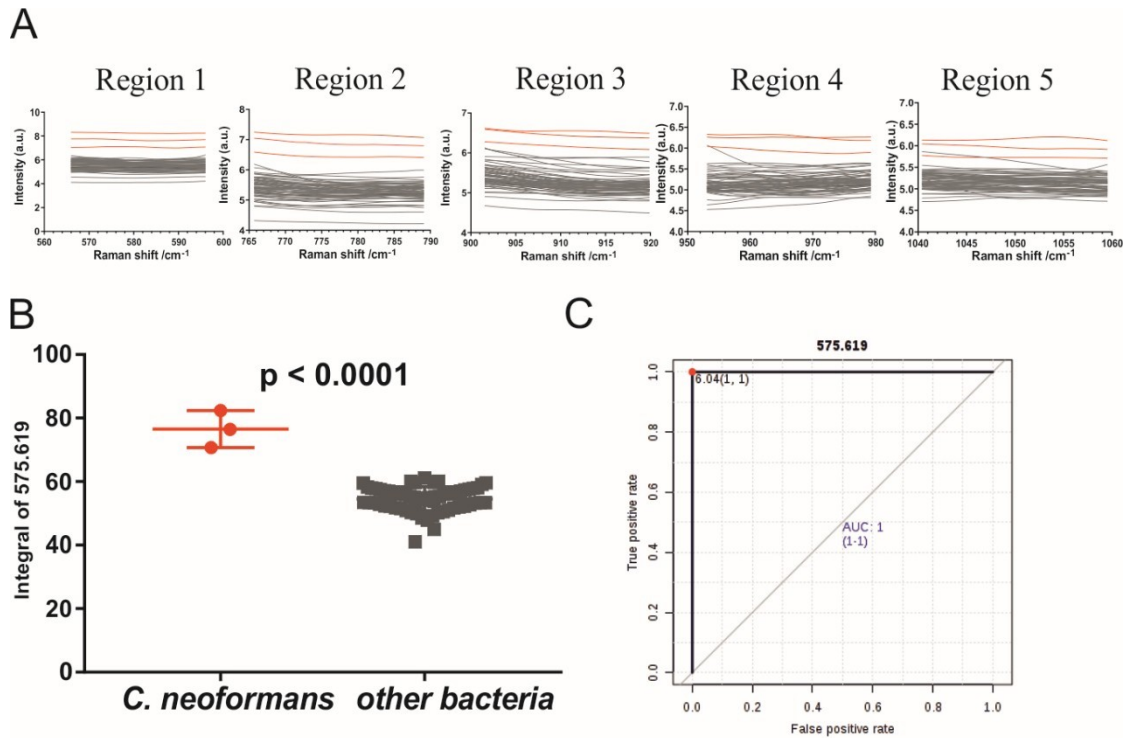

**Figure S28.** (A) SERS spectra of different region (selected) between the *C. neoformans* (red) and other 21 bacteria (grey). (B) Integral of Raman shift: 575.619 in the *C. neoformans* (red) and other 21 bacteria (grey). (C) ROC curve with a 95% confidence interval (in brackets) generated from defined feature (integral of Raman shift: 575.619).

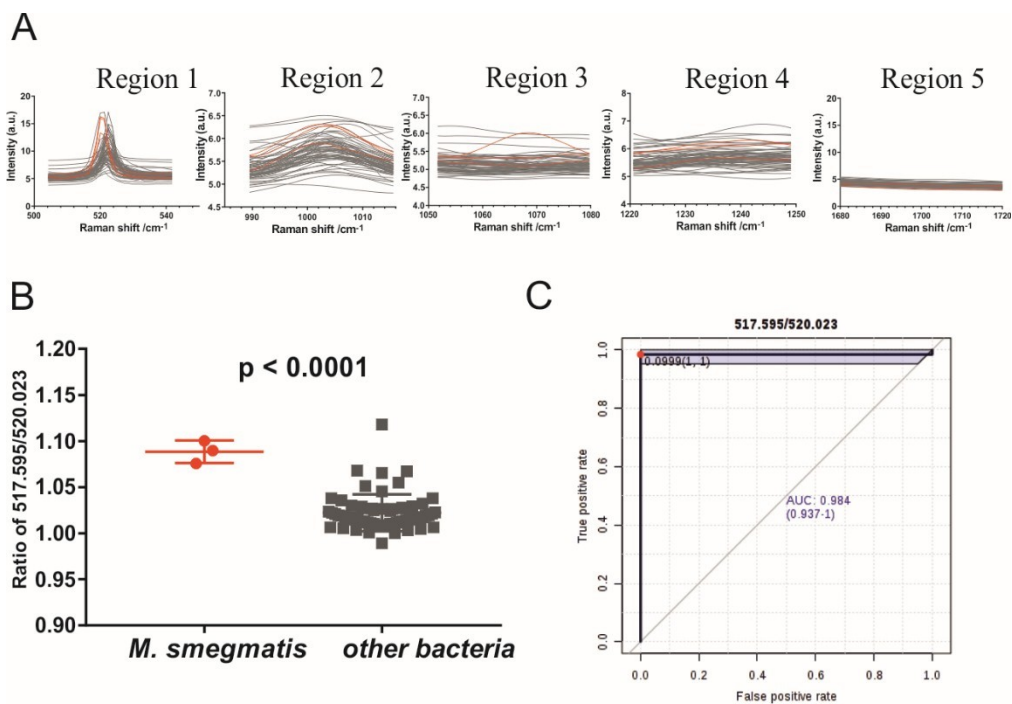

**Figure S29.** (A) SERS spectra of different region (selected) between the *M. smegmatis* (red) and other 21 bacteria (grey). (B) Ratio of integral of Raman shift: 517.595/ 520.023 in the *M. smegmatis* (red) and other 21 bacteria (grey). (C) ROC curve with a 95% confidence interval (in brackets) generated from defined feature (ratio of integral of Raman shift: 517.595/ 520.023).



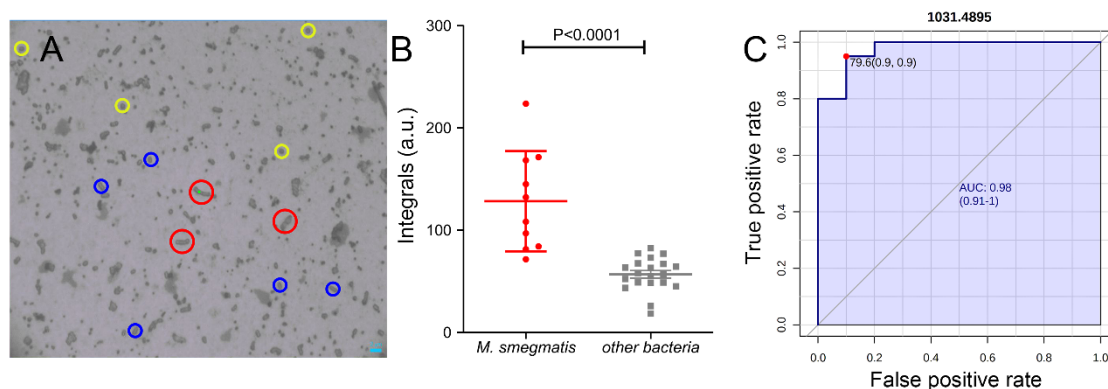

**Figure S30.** (A) Microscopic image of bacteria mixture (contains of *M. smegmatis* (Mycobacterium, marked in red circle), *S. aureus* (Coccus, marked in yellow circle), *E. coli* O157, *S. paratyphi* A, *V. parahaemolyticus* and *L. monocytogenes* (Bacterium, marked in blue circle)) in Raman system. (B) Integral of Raman shift: 1031 in the *M. smegmatis* (red) and other bacteria (grey). (C) ROC curve with a 95% confidence interval (in brackets) generated from defined feature (integral of Raman shift: 1031).

**Table S1.** The source of bacteria and culture medium. BNCC: BeNa Culture Collection

| Source                                             | bacteria                     | culture medium            |
|----------------------------------------------------|------------------------------|---------------------------|
| Anti-plague Institute Hebei Province               | <i>B. melitensis</i>         | Luria-Bertani             |
| Beijing Institute of Microbiology and Epidemiology | <i>F. tularensis</i>         | Alkaline Peptone Broth    |
| Anti-plague Institute Hebei Province               | <i>Y. pestis</i>             | Luria-Bertani             |
| Beijing Institute of Microbiology and Epidemiology | <i>E. coli</i> O157          | Luria-Bertani             |
| BNCC337823                                         | <i>S. paratyphi</i> A        | Luria-Bertani             |
| BNCC103389                                         | <i>S. paratyphi</i> B        | Luria-Bertani             |
| BNCC339948                                         | <i>S. paratyphi</i> C        | Luria-Bertani             |
| BNCC108331                                         | <i>S. typhi</i>              | Luria-Bertani             |
| BNCC108207                                         | <i>S. typhimurium</i>        | Luria-Bertani             |
| BNCC353759                                         | <i>S. enteritidis</i>        | Luria-Bertani             |
| BNCC126547                                         | <i>S. choleraesuis</i>       | Luria-Bertani             |
| BNCC105263                                         | <i>V. parahaemolyticus</i>   | Luria-Bertani             |
| BNCC338021                                         | <i>L. monocytogenes</i>      | Brain Heart Infusion Agar |
| BNCC139467                                         | <i>L. innocua</i>            | Luria-Bertani             |
| Beijing Institute of Microbiology and Epidemiology | <i>B. anthracis</i>          | Luria-Bertani             |
| Beijing Institute of Microbiology and Epidemiology | <i>B. subtilis</i> var.niger | Luria-Bertani             |

|            |                         |                           |
|------------|-------------------------|---------------------------|
| BNCC136456 | <i>B. thuringiensis</i> | Luria-Bertani             |
| BNCC103930 | <i>B. cereus</i>        | Luria-Bertani             |
| BNCC188062 | <i>B. subtilis</i>      | Luria-Bertani             |
| BNCC310011 | <i>S. aureus</i>        | Luria-Bertani             |
| BNCC337347 | <i>C. neoformans</i>    | YM Medium                 |
| BNCC104116 | <i>M. smegmatis</i>     | Brain Heart Infusion Agar |

**Table S2.** Area under the ROC curve (AUC) values obtained from ROC analysis for the detection of all bacteria.

| classification           |                              |                            | bacteria                             | Region               | Region              | Region | Region | Region | AUC       | confidence interval | p-value   |           |
|--------------------------|------------------------------|----------------------------|--------------------------------------|----------------------|---------------------|--------|--------|--------|-----------|---------------------|-----------|-----------|
| Classification of dyeing | Morphological classification | species                    |                                      | 1                    | 2                   | 3      | 4      | 5      |           |                     |           |           |
| G-                       | Bacterium                    | brucella                   | <i>B. melitensis</i>                 | 518                  | 1000                | 1101   | 1208   | 1761   | 0.926     | 0.783-1.0           | 0.0053    |           |
|                          |                              | francisella                | <i>F. tularensis</i>                 | 523                  | 886                 | 1495   | 1509   | 1622   | 0.947     | 0.857-1.0           | 0.0092    |           |
|                          |                              | yersinia                   | <i>Y. pestis</i>                     | 971                  | 1092                | 1099   | 1584   | 1613   | 0.974     | 0.915-1.0           | 0.0039    |           |
|                          |                              | escherichia                | <i>E. coli</i> O157                  | 518                  | 888                 | 1167   | 1190   | 1799   | 0.974     | 0.921-1.0           | <0.0001   |           |
|                          |                              | salmonella                 | <i>S. paratyphi</i> A                | 1177                 | 1446                | 1461   | 1485   | 1518   | 1         | 1.0                 | <0.0001   |           |
|                          |                              |                            | <i>S. paratyphi</i> B                | 752                  | 868                 | 939    | 1007   | 1039   | 0.926     | 0.794-1.0           | 0.0090    |           |
|                          |                              |                            | <i>S. paratyphi</i> C                | 1530                 | 1625                | 1668   | 1731   | 1964   | 1         | 0.979-1.0           | 0.0001    |           |
|                          |                              |                            | <i>S. typhi</i>                      | 1189                 | 1410                | 1511   | 1673   | 1759   | 1         | 1.0                 | 0.0006    |           |
|                          |                              |                            | <i>S. typhimurium</i>                | 1122                 | 1231                | 1270   | 1385   | 1634   | 0.947     | 0.87-0.989          | 0.0168    |           |
|                          |                              |                            | <i>S. enteritidis</i>                | 524                  | 692                 | 841    | 1108   | 1496   | 0.804     | 0.5-1.0             | 0.0140    |           |
|                          |                              |                            | <i>S. choleraesuis</i>               | 526                  | 742                 | 855    | 945    | 1759   | 0.942     | 0.825-1.0           | 0.0010    |           |
| Vibrio                   | Vibrio                       | <i>V. parahaemolyticus</i> | 863                                  | 1154                 | 1165                | 1339   | 1636   | 0.926  | 0.778-1.0 | 0.0019              |           |           |
| G+                       | Bacterium                    | listeria                   | <i>L. monocytogenes</i>              | 522                  | 1617                | 1774   | 1869   | 1910   | 0.968     | 0.915-1.0           | 0.0067    |           |
|                          |                              |                            | <i>L. innocua</i>                    | 521                  | 642                 | 1237   | 1545   | 1559   | 0.738     | 0.54-0.926          | 0.2157    |           |
|                          |                              | bacillus                   | <i>B. anthracis</i>                  | 521                  | 1024                | 932    | 1566   | 1596   | 0.968     | 0.899-1.0           | 0.0001    |           |
|                          |                              |                            | <i>B. subtilis</i> var. <i>niger</i> | 1132                 | 1234                | 1313   | 1340   | 1598   | 1         | 1.0                 | 0.0010    |           |
|                          |                              |                            | <i>B. thuringiensis</i>              | 660                  | 878                 | 1214   | 1551   | 1755   | 0.979     | 0.937-1.0           | 0.003     |           |
|                          |                              |                            | <i>B. cereus</i>                     | 898                  | 1402                | 1605   | 1621   | 1657   | 0.984     | 0.952-1.0           | 0.0017    |           |
|                          |                              |                            | <i>B. subtilis</i>                   | 521                  | 1103                | 1167   | 1197   | 1294   | 0.995     | 0.955-1.0           | <0.0001   |           |
|                          |                              | Coccus                     | staphylococcus                       | <i>S. aureus</i>     | 854                 | 1006   | 1145   | 1638   | 1842      | 0.966               | 0.862-1.0 | 0.0049    |
|                          |                              |                            |                                      | <i>C. neoformans</i> | 580                 | 777    | 911    | 963    | 1053      | 1                   | 1.0       | <0.0001   |
|                          |                              | acid-fast staining         | Mycobacterium                        | mycobacteriu         | <i>M. smegmatis</i> | 521    | 999    | 1066   | 1233      | 1701                | 0.984     | 0.937-1.0 |

**Table S3.** Major spectral band assignments for bacteria.<sup>1-3</sup>

| Raman Shift /cm <sup>-1</sup> | Band assignments                                            |
|-------------------------------|-------------------------------------------------------------|
| ~520                          | Si wafer                                                    |
| 580                           | C-O-C glycosidic ring deformation                           |
| 640-660                       | Nucleic acids                                               |
| 742-777                       | Adenine, FAD, NAG                                           |
| 841                           | Cytosine, uracil, tyrosine                                  |
| ~855                          | ring breathing Tyr protein                                  |
| 911-932                       | C-C stretching modes in proteins                            |
| 939-971                       | C-N stretching modes                                        |
| ~1000                         | Phenylalanine ring breathing                                |
| 1024-1066                     | C-C ring breathing                                          |
| ~1100                         | C-O stretching (amides), proteins                           |
| 1122                          | NH <sup>3+</sup> formation vibration                        |
| 1130-1180                     | Amide, DNA, C-N stretching vibration of adenine             |
| 1216-1295                     | Amide III                                                   |
| 1313-1340                     | Adenine breathing ring                                      |
| 1385                          | Thymine breathing ring                                      |
| 1498-1410                     | C-O vibration, COO- symmetrical vibration                   |
| 1430-1461                     | CH <sub>2</sub> deformation lipids, proteins, carbohydrates |
| 1494-1509                     | Phe                                                         |
| 1516-1553                     | C-H bend or C=C stretching                                  |
| 1559-1605                     | C-N stretching proteins, DNA, Amides                        |
| 1617-1621                     | C=C stretching olefinic                                     |

## REFERENCES

- (1) Liu, Y.; Zhou, H.; Hu, Z.; Yu, G.; Yang, D.; Zhao, J. Label and label-free based surface-enhanced Raman scattering for pathogen bacteria detection: A review. *Biosens. Bioelectron* **2017**, *94*, 131-140.
- (2) Alula, M. T.; Krishnan, S.; Hendricks, N. R.; Karamchand, L.; Blackburn, J. M. Identification and quantitation of pathogenic bacteria via in-situ formation of silver nanoparticles on cell walls, and their detection via SERS. *Microchim. Acta* **2016**, *184*, 219-227.
- (3) Chisanga, M.; Muhamadali, H.; Ellis, D. I.; Goodacre, R. Surface-Enhanced Raman Scattering (SERS) in Microbiology: Illumination and Enhancement of the Microbial World. *Appl. Spectrosc.* **2018**, *72*, 987-1000.
